# Supplementary material
Source: ML conference proceedings conference paper supplement (https://proceedings.neurips.cc/paper_files/paper/2014/hash/6c1da886822c67822bcf3679d04369fa-Abstract.html)
Supplement: Supplementary file [file 6c1da886822c67822bcf3679d04369fa-Supplemental.zip]

## Supplementary Material

**Lemma 3.1.** Assume  $\epsilon_{i,j}$  for  $(i,j) \in \Omega$  are i.i.d. sub-gaussian with  $\sigma = \|\epsilon_{i,j}\|_{\psi_1}$ . Then with probability  $1 - \frac{e}{N^{4ch}}$ ,  $\|\pi_B(\Delta)\|_* \leq \|\pi_{\bar{B}}(\Delta)\|_* + \frac{2c^2\sigma^2\sqrt{mn}}{N\lambda} \log^2 N$ . Here  $h > 0$  is an absolute constant associated with the sub-gaussian noise.

*Proof.* Because  $\hat{X}$  is the optimal solution to Eq.(2),

$$\frac{1}{N} \|Y - \hat{X}\|_\Omega^2 + \frac{\lambda}{\sqrt{mn}} \|\hat{X}\|_* \leq \frac{1}{N} \|Y - \check{X}\|_\Omega^2 + \frac{\lambda}{\sqrt{mn}} \|\check{X}\|_* \quad (10)$$

Plug in  $Y_{i,j} = X_{i,j} + \epsilon_{i,j}$  and reorganize the terms, we get

$$\frac{1}{N} \|\Delta\|_\Omega^2 - \frac{1}{N} \sum_{(i,j) \in \Omega} \epsilon_{i,j} \Delta_{i,j} \leq \frac{\lambda}{\sqrt{mn}} (\|\check{X}\|_* - \|\check{X} + \Delta\|_*) \quad (11)$$

From our assumptions, the noise  $\epsilon_{i,j} \sim \text{Sub}(\sigma^2)$ . From a Hoeffding-type inequality (see proposition 5.10 in [15]), with probability at least  $1 - \frac{e}{N^{4ch}}$ ,

$$\sum_{(i,j) \in \Omega} \epsilon_{i,j} \Delta_{i,j} \leq 2c\sigma \log N \|\Delta\|_\Omega \quad (12)$$

where  $h > 0$  is a constant. Combining the two results yields

$$\frac{1}{N} \|\Delta\|_\Omega^2 \leq \frac{2\lambda}{\sqrt{mn}} (\|\check{X}\|_* - \|\check{X} + \Delta\|_*) + \frac{4c^2\sigma^2 \log^2 N}{N} \quad (13)$$

By triangle inequality,

$$\|\check{X} + \Delta\|_* \geq \|\pi_A(\check{X}) + \pi_B(\Delta)\|_* - \|\pi_A(\check{X})\|_* - \|\pi_{\bar{B}}(\Delta)\|_* \quad (14)$$

We assume  $\check{X}$  has low rank and  $A, B$  are two orthogonal subspace, then

$$\|\check{X} + \Delta\|_* \geq \|\check{X}\|_* + \|\pi_B(\Delta)\|_* - \|\pi_{\bar{B}}(\Delta)\|_* \quad (15)$$

Substitute the result back to (13) and combine with fact that  $\|\Delta\|_\Omega^2 \geq 0$ , we have

$$\|\pi_B(\Delta)\|_* \leq \|\pi_{\bar{B}}(\Delta)\|_* + \frac{2c^2\sigma^2\sqrt{mn}}{N\lambda} \log^2 N \quad (16)$$

□

**Theorem 3.2.** Assume RSC for the set  $D(b, n, N)$  with parameter  $\kappa > 0$  where  $b = \frac{c\sigma\sqrt{m}}{\lambda_0\alpha}$ . Let  $\lambda = \lambda_0 c\sigma \frac{\log N}{\sqrt{N}}$ , then we have  $\frac{1}{\sqrt{mn}} \|\Delta\|_F \leq 2c\sigma \left( \frac{1}{\sqrt{\kappa}} + \frac{\sqrt{2r}}{\kappa} \right) \frac{\log N}{\sqrt{N}}$  with probability at least  $1 - \frac{e}{N^{4ch}}$  where  $h, c > 0$  are constants.

*Proof.* Combining (13) and (12) yields,

$$\frac{1}{N} \|\Delta\|_\Omega^2 \leq \frac{2\lambda}{\sqrt{mn}} \|\pi_{\bar{B}}(\Delta)\|_* + \frac{4c^2\sigma^2 \log^2 N}{N} \leq \frac{2\sqrt{2r}\lambda}{\sqrt{mn}} \|\Delta\|_F + \frac{4c^2\sigma^2 \log^2 N}{N} \quad (17)$$

where the second inequality is because the rank of  $\pi_{\bar{B}}(\Delta)$  is at most  $2r$ . From RSC property,

$$\frac{k}{mn} \|\Delta\|_F^2 \leq \frac{2\sqrt{2r}\lambda}{\sqrt{mn}} \|\Delta\|_F + \frac{4c^2\sigma^2 \log^2 N}{N} \quad (18)$$

The bound on  $\|\Delta\|_F$  can be subsequently obtained by solving a quadratic equation, and we get

$$\frac{1}{\sqrt{mn}} \|\Delta\|_F \leq \frac{2c\sigma \log N}{\sqrt{\kappa}N} + 2\sqrt{2r} \frac{\lambda}{\kappa} \quad (19)$$

Substituting  $\lambda$  completes the proof. □

**Lemma 3.3.** *If  $\frac{1}{\sqrt{mn}} \|\hat{X} - \check{X}\|_F \leq \delta$ , then  $\|\hat{\Sigma} - \check{\Sigma}\|_F \leq \sqrt{2}\delta$*

*Proof.* Let  $PSQ^T$  be the SVD of  $\sqrt{R}X$ , then upon a unitary transformation  $U = R^{-\frac{1}{2}}PS^{\frac{1}{2}}$  and  $V = QS^{\frac{1}{2}}$ . Correspondingly  $\Sigma = \frac{1}{\sqrt{mn}}VV^T = \frac{1}{\sqrt{mn}}QSQ^T$ . Note that  $QSQ^T$  is equivalent to the polar decomposition of  $X$  defined as  $(X^T X)^{\frac{1}{2}}$ . The perturbation bound for polar decomposition (see [9]) then gives

$$\begin{aligned} \|\Sigma - \check{\Sigma}\|_F &\leq \sqrt{\frac{2}{mn}} \|\sqrt{R}X - \sqrt{R}\check{X}\|_F \\ &= \sqrt{2} \|X - \check{X}\|_F \end{aligned} \quad (20)$$

□

**Theorem 3.4.** *Assume  $\check{X}_i$  are i.i.d samples from a distribution with support only in a subspace of dimension  $r$  and bounded norm  $\|\check{X}_i\| \leq \alpha\sqrt{m}$ . Let  $\beta_1$  and  $\beta_r$  be the smallest and largest eigenvalues of  $\Sigma^*$ . Then, for large enough  $n$ , with probability at least  $1 - \frac{r}{n^2}$ ,*

$$\|\check{\Sigma} - \Sigma^*\|_F \leq 2\sqrt{r}\alpha \sqrt{\frac{\beta_r \log n}{\beta_1 n}} + o\left(\frac{\log n}{n}\right) \quad (21)$$

*Proof. (sketch)* We first bound  $\|\Theta^n - \Theta^*\|_{op} \leq 2\alpha\sqrt{\frac{\beta_r \log n}{n}}$  by matrix Bernstein inequalities. If  $\beta_1$  is the minimum eigenvalue,  $\|\check{\Sigma} - \Sigma^*\|_{op} = \|(\Theta^n)^{\frac{1}{2}} - (\Theta^*)^{\frac{1}{2}}\|_{op}$  is upper bounded by  $\frac{1}{2\beta_1} \|\Theta^n - \Theta^*\|_{op}$ . Finally we have used  $\|\check{\Sigma} - \Sigma^*\|_F \leq \sqrt{r} \|\check{\Sigma} - \Sigma^*\|_{op}$ . □

Combining this with the previous theorem, we find that for large enough  $n$  and  $c$ , with probability at least  $1 - \frac{2r}{n^2}$ ,

$$\begin{aligned} \|\hat{\Sigma} - \Sigma^*\|_F &\leq c\sigma \sqrt{\frac{\log N}{N}} \left( \sqrt{\frac{6}{\kappa}} + \frac{4\sqrt{2r}\lambda_0\alpha}{\kappa} \right) \\ &\quad + 2\sqrt{r}\alpha \sqrt{\frac{\beta_r \log n}{\beta_1 n}} + o\left(\frac{\log n}{n}\right) \end{aligned} \quad (22)$$

**Theorem 3.5.** *Suppose  $\|\Sigma - \Sigma^*\|_F \leq \delta \ll \beta_1$ ,  $\phi \in \mathcal{D}(\gamma)$ . For any  $\hat{x} \in \text{row}((Q^*)^T)$ , our observation  $x_\phi = \hat{x}_\phi + \epsilon_\phi$  where  $\epsilon_\phi \sim \text{Sub}(\sigma^2)$  is the noise vector. The predicted ratings over the remaining entries are given by  $\hat{x}_{\phi^c} = \Sigma_{\phi^c, \phi}(\lambda'I + \Sigma_{\phi, \phi})^{-1}x_\phi$ . Then, with probability at least  $1 - \exp(-c_2 \min(c_1^4, \sqrt{|\phi|}c_1^2))$ ,*

$$\|x_{\phi^c} - \hat{x}_{\phi^c}\|_F \leq 2\sqrt{\lambda'} + \delta \left( \sqrt{\gamma \frac{m}{|\phi|}} + 1 \right) \left( \frac{\|\hat{x}\|_F}{\sqrt{\beta_1}} + \frac{2c_1\sigma|\phi|^{\frac{1}{4}}}{\sqrt{\lambda'}} \right)$$

where  $c_1, c_2 > 0$  are constants.

*Proof. (sketch)* We consider an equivalent optimization problem

$$\hat{x}_{\phi^c} = \underset{y}{\text{argmin}} [x_\phi; y]^T (\lambda'I + \Sigma)^{-1} [x_\phi; y] \quad (23)$$

where the coordinates  $\phi$  are arranged on top. From optimality of  $\hat{x}_{\phi^c}$  in comparison to  $y = \hat{x}_{\phi^c}$  we can upper bound  $\|[0; \hat{x}_{\phi^c} - \hat{x}_{\phi^c}]^T (\lambda'I + \Sigma)^{-\frac{1}{2}}\|_F$  (\*) in terms of  $\|\hat{x}\|$  and a noise term. The difference vector  $[0; \hat{x}_{\phi^c} - \hat{x}_{\phi^c}]$  can be decomposed as  $[x_1; y_1] + [-x_1; y_2]$  where  $[x_1; y_1]^T \in \text{col}(Q^*)$  and  $[-x_1; y_2]^T \in \text{col}((Q^*)^\perp)$  and the goal is to upper bound them separately. By triangle inequality, we have  $\|[0; \hat{x}_{\phi^c} - \hat{x}_{\phi^c}]^T (\lambda'I + \Sigma)^{-\frac{1}{2}}\|_F \geq \|[-x_1; y_2]^T (\lambda'I + \Sigma)^{-\frac{1}{2}}\|_F - \|[x_1; y_1]^T (\lambda'I + \Sigma)^{-\frac{1}{2}}\|_F$ . For a small  $\delta$  we can get upper and lower bounds on  $(\lambda'I + \Sigma)^{-1}$  projected to the two orthogonal subspaces. Applying these bounds to the previous inequality and (\*), we can bound  $\|[-x_1; y_2]\|_F$  as well as  $\|x_1\|_F$ . Finally, since  $\phi \in D(\gamma)$  we can estimate  $\|[x_1; y_1]\|_F$  as a function of  $\|x_1\|_F$ . The result follows by combining these and triangle inequality  $\|x_{\phi^c} - \hat{x}_{\phi^c}\|_F \leq \|[x_1; y_1]\|_F + \|[-x_1; y_2]\|_F$ . □

**Theorem 4.2.** Let  $z_i = \text{sign}(r'_i)$  and  $h = (\sum_{i=1}^m |r'_i|)/m$ . The minimizing distribution of (9) is given by  $\Pr(u = zh) = \Pr(u = -zh) = 1/2$ .

*Proof.* Expanding the objective yields

$$\begin{aligned} & \mathbb{E}_{\mathbf{p}} \|uu^T - r'r'^T\|_F^2 \\ &= \mathbb{E}_{\mathbf{p}} \sum_{i,j} \left\{ u_i^2 u_j^2 - 2u_i u_j r'_i r'_j + r_i'^2 r_j'^2 \right\} \\ &= \mathbb{E}[(\sum_i u_i^2)^2] - 2\mathbb{E}[(\sum_i u_i r'_i)^2] + (\sum_i r_i'^2)^2 \end{aligned}$$

From the privacy constraint,  $\mathbb{E}[(\sum_i u_i^2)^2] \geq \mathbb{E}^2[\sum_i u_i^2] = m^2 v^2$ . In addition, because  $E[u_i u_j] r'_i r'_j \leq \sqrt{E[u_i^2] E[u_j^2]} |r'_i r'_j| = v |r'_i r'_j|$ ,  $\mathbb{E}[(\sum_i u_i r'_i)^2] \leq v (\sum_i |r'_i|)^2$ . Therefore the objective is lower bounded as

$$m^2 v^2 - 2v (\sum_i |r'_i|)^2 + (\sum_i r_i'^2)^2$$

The lower bound is attained when  $u = \sqrt{v} z a$ , where  $a$  is a single binary random variable taken values in  $\{-1, +1\}$  with equal probability. Finally, optimizing  $v$  gives  $v = (\frac{\sum_i |r'_i|}{m})^2$ .

□
